# Supplementary material for: Effects of uric acid, creatinine clearance, and infusion duration on the population pharmacokinetics of meropenem in critically ill patients
Source: Research Square preprint supplement (doi:10.21203/rs.3.rs-471732/v2), 2021-06-25
Supplement: Supplementary file 1 [file 96a16d8a5cbbfdd973efa18d.pdf]

Table S1 Meropenem probabilities of target attainment for different CG-CLCR, uric acid values, dosage regimens and MICs with a duration of 0.5h<sup>a</sup>.

| Dose (mg) /q8h<br>(Duration 0.5h) | UA<br>( $\mu$ mol/L) | CG-CLCR<br>(ml/min) | PTA (%)   |        |       |           |        |       |           |       |       |           |       |       |
|-----------------------------------|----------------------|---------------------|-----------|--------|-------|-----------|--------|-------|-----------|-------|-------|-----------|-------|-------|
|                                   |                      |                     | MIC=1mg/L |        |       | MIC=2mg/L |        |       | MIC=4mg/L |       |       | MIC=8mg/L |       |       |
|                                   |                      |                     | A         | B      | C     | A         | B      | C     | A         | B     | C     | A         | B     | C     |
| 500                               | 40                   | 30                  | 97.33     | 38.33  | 10.33 | 90.33     | 21.00  | 3.00  | 72.00     | 9.67  | 0.00  | 31.00     | 3.00  | 0.00  |
| 500                               | 40                   | 60                  | 81.33     | 10.00  | 1.00  | 61.67     | 4.33   | 0.00  | 32.00     | 1.00  | 0.00  | 9.00      | 0.00  | 0.00  |
| 500                               | 40                   | 120                 | 48.00     | 1.00   | 0.00  | 27.67     | 0.00   | 0.00  | 8.67      | 0.00  | 0.00  | 0.67      | 0.00  | 0.00  |
| 500                               | 400                  | 30                  | 100.00    | 99.00  | 93.33 | 100.00    | 98.67  | 78.33 | 99.67     | 92.00 | 44.00 | 96.00     | 74.00 | 4.67  |
| 500                               | 400                  | 60                  | 100.00    | 98.67  | 77.33 | 100.00    | 92.00  | 46.67 | 98.67     | 75.67 | 13.00 | 86.00     | 45.33 | 1.33  |
| 500                               | 400                  | 120                 | 99.33     | 90.00  | 45.00 | 97.33     | 71.00  | 12.33 | 89.00     | 44.33 | 1.33  | 56.67     | 11.67 | 0.00  |
| 500                               | 800                  | 30                  | 100.00    | 100.00 | 99.00 | 100.00    | 99.00  | 87.67 | 99.67     | 97.33 | 31.67 | 99.67     | 83.67 | 0.00  |
| 500                               | 800                  | 60                  | 100.00    | 99.33  | 90.67 | 100.00    | 97.00  | 56.67 | 99.67     | 88.00 | 7.33  | 97.00     | 54.67 | 0.00  |
| 500                               | 800                  | 120                 | 100.00    | 96.33  | 58.67 | 100.00    | 84.00  | 16.00 | 99.00     | 56.00 | 0.67  | 77.67     | 15.67 | 0.00  |
| 1000                              | 40                   | 30                  | 99.00     | 50.67  | 21.33 | 97.33     | 37.67  | 10.33 | 90.33     | 21.00 | 3.00  | 72.00     | 10.33 | 0.00  |
| 1000                              | 40                   | 60                  | 91.67     | 20.67  | 4.33  | 81.33     | 10.33  | 1.00  | 61.67     | 4.00  | 0.00  | 32.00     | 1.00  | 0.00  |
| 1000                              | 40                   | 120                 | 65.33     | 4.33   | 0.00  | 48.00     | 1.00   | 0.00  | 27.67     | 0.00  | 0.00  | 8.67      | 0.00  | 0.00  |
| 1000                              | 400                  | 30                  | 100.00    | 100.00 | 99.33 | 100.00    | 99.33  | 93.33 | 100.00    | 98.00 | 78.33 | 99.67     | 91.33 | 44.00 |
| 1000                              | 400                  | 60                  | 100.00    | 99.67  | 93.67 | 100.00    | 98.00  | 77.33 | 100.00    | 90.67 | 46.67 | 98.67     | 75.00 | 13.00 |
| 1000                              | 400                  | 120                 | 100.00    | 96.67  | 73.67 | 99.33     | 90.67  | 45.00 | 97.33     | 72.00 | 12.33 | 89.00     | 43.00 | 1.33  |
| 1000                              | 800                  | 30                  | 100.00    | 100.00 | 99.67 | 100.00    | 100.00 | 99.00 | 100.00    | 98.33 | 87.67 | 99.67     | 97.00 | 31.67 |
| 1000                              | 800                  | 60                  | 100.00    | 100.00 | 99.33 | 100.00    | 99.00  | 90.67 | 100.00    | 96.67 | 56.67 | 99.67     | 88.33 | 7.33  |
| 1000                              | 800                  | 120                 | 100.00    | 98.67  | 86.33 | 100.00    | 97.00  | 58.67 | 100.00    | 82.67 | 16.00 | 90.33     | 21.00 | 3.00  |
| 2000                              | 40                   | 30                  | 99.67     | 67.00  | 39.00 | 99.00     | 50.33  | 21.33 | 97.33     | 37.00 | 10.33 | 90.33     | 21.33 | 3.00  |
| 2000                              | 40                   | 60                  | 97.67     | 29.33  | 10.67 | 91.67     | 20.00  | 4.33  | 81.33     | 10.67 | 1.00  | 61.67     | 4.00  | 0.00  |
| 2000                              | 40                   | 120                 | 79.00     | 7.67   | 1.00  | 65.33     | 4.67   | 0.00  | 48.00     | 1.00  | 0.00  | 27.67     | 0.00  | 0.00  |

|      |     |     |        |        |        |        |        |       |        |        |       |        |       |       |
|------|-----|-----|--------|--------|--------|--------|--------|-------|--------|--------|-------|--------|-------|-------|
| 2000 | 400 | 30  | 100.00 | 100.00 | 99.67  | 100.00 | 100.00 | 99.33 | 100.00 | 99.00  | 93.33 | 100.00 | 98.00 | 78.33 |
| 2000 | 400 | 60  | 100.00 | 100.00 | 99.33  | 100.00 | 99.67  | 93.67 | 100.00 | 98.67  | 77.33 | 100.00 | 91.33 | 46.67 |
| 2000 | 400 | 120 | 100.00 | 99.67  | 91.67  | 100.00 | 97.00  | 73.67 | 99.33  | 90.67  | 45.00 | 97.33  | 71.33 | 12.33 |
| 2000 | 800 | 30  | 100.00 | 100.00 | 100.00 | 100.00 | 100.00 | 99.67 | 100.00 | 100.00 | 99.00 | 100.00 | 99.67 | 87.67 |
| 2000 | 800 | 60  | 100.00 | 100.00 | 99.67  | 100.00 | 100.00 | 99.33 | 100.00 | 99.67  | 90.67 | 100.00 | 97.67 | 56.67 |
| 2000 | 800 | 120 | 100.00 | 100.00 | 99.00  | 100.00 | 99.33  | 86.33 | 100.00 | 98.00  | 58.67 | 100.00 | 84.33 | 16.00 |

<sup>a</sup> The target was calculated for the drug concentration to remain above the MIC for 40%, 100% and 4MIC for 100%, respectively. The meropenem target MIC was chosen according to the MIC value of our hospital.

q8h, three times-daily dosing; UA, uric acid; CG-CLCR, creatinine clearance calculated using the Cockcroft-Gault equation; MIC, Minimum inhibitory concentration; PTA, probabilities of target attainment.
